# Supplementary material for: Assessing Ecological Disturbance in Neotropical Forest Landscapes Using High-Level Diversity and High-Level Functionality: Surprising Outcomes from a Case Study with Spider Assemblages
Source: MDPI journal article supplement (doi:10.3390/land10070758), 2021-07-19
Supplement: s1 [file s1]

## Supplementary material

**Table S1.** Generic characteristics of the ecosystems sampled in the municipality of Uruará, state Pará, northern Brazil.

| Ecosystems                                                             | N. areas | Characteristics                                                                                                                                                                                                                                                                                                                                                                                                                                                                                                                                                                                                                                                                                                           |
|------------------------------------------------------------------------|----------|---------------------------------------------------------------------------------------------------------------------------------------------------------------------------------------------------------------------------------------------------------------------------------------------------------------------------------------------------------------------------------------------------------------------------------------------------------------------------------------------------------------------------------------------------------------------------------------------------------------------------------------------------------------------------------------------------------------------------|
| Primary forest – PF                                                    | 02       | Composed of vegetation whose facies is an upper canopy formed mainly by green trees, with crowns that touch each other, creating a dense and enclosed canopy all year round. In this ecosystem no traces of anthropic actions were verified (for example, trails, residues, fires, selective cutting of wood, agricultural activities, among others). Large amounts of litter dominate the ground level, which contributes to the maintenance and fertility of the soil, and serves as food and shelter for several species (Da Silva <i>et al.</i> , 2018)                                                                                                                                                               |
| Secondary forest - SF<br>(vegetation with 15 years<br>of regeneration) | 02       | A secondary forest (or second-growth forest) is a forest or woodland area which has re-grow after abandonment of agriculture. This type of forest arises from natural succession of vegetation, resulting from abandonment after a period of use, a very common action in the Amazon region (Vieira <i>et al.</i> , 2008). Biological diversity gradually increases if there are primary remnants to supply seeds. The average height of the trees is over 12 meters and the average diameter is over 14 centimeters. The understory presents usually a dense vegetation, with an intermediate size, greater than 3 meters of height but also with a high amount of litter on the ground (Da Silva <i>et al.</i> , 2018). |

|                                                                                    |    |                                                                                                                                                                                                                                                                                                                                                                                                                                                                                                                                                                                                                   |
|------------------------------------------------------------------------------------|----|-------------------------------------------------------------------------------------------------------------------------------------------------------------------------------------------------------------------------------------------------------------------------------------------------------------------------------------------------------------------------------------------------------------------------------------------------------------------------------------------------------------------------------------------------------------------------------------------------------------------|
| Incipient Secondary forest– <b>IF</b> (vegetation with five years of regeneration) | 02 | This type of forest is an embryonic stage of plant succession and consequently presents a more simplified plant composition, with little canopy coverage. These environments have high soil temperature and acidity, little accumulated litter, and a greater presence of several species shrubs, graminoids and forbs (Da Silva, <i>et al.</i> , 2018).The average height of trees is no more than four meters and the diameter of the main trees can reach up to eight centimeters This phase typically lasts up to six years and in some cases up to ten years, depending on soil quality and / or seed bank.. |
| Agroforestry – <b>AF</b> (cocoa plantations)                                       | 02 | Agroecosystem represented by areas planted with cacao crops ( <i>Theobroma cacao</i> L.) in the form of monocultures. Vegetation can reach 5 to 8 m in height, with a closed canopy and a large amount of litter,. Due to the constant cleaning process, the presence and richness of herbaceous and shrubs remains usually low (Santos <i>et al.</i> , 2015).                                                                                                                                                                                                                                                    |
| Pasture for extensive livestock – <b>PA</b>                                        | 02 | Herbaceous vegetation consisting predominantly of exotic grasses, namely of the genus <i>Brachiaria</i> spp, used for extensive livestock farming (e.g., raising cattle). This environment is characterized by high incidence of sunlight soil, soil compaction by cattle, and absence of litter accumulation (Falcão <i>et al.</i> , 2015).                                                                                                                                                                                                                                                                      |

**Table S2.** Environmental variables monitored during fieldworks.

Temperature, humidity and precipitation were measured during 48 hours (an equivalent period to the pitfall traps activation) with a local portable weather station (Oregon Scientific WMR200A) and linked with online wheatear platforms to check for consistency. Afterwards, these values were aggregated to daily averages.

| Ecosystems                      | Environmental Variables |               |                 |               |             |              |               |             |              |              |              |               |              |             |
|---------------------------------|-------------------------|---------------|-----------------|---------------|-------------|--------------|---------------|-------------|--------------|--------------|--------------|---------------|--------------|-------------|
|                                 | T                       | H             | P               | CBH           | CAH         | GC           | RP            | HLL         | LLC          | GC           | PES          | AP            | AS           | RS          |
| Primary forest (PF)             | 25,81 ± 1,35            | 91,31 ± 5,63  | 131,66 ± 104,55 | 343,11 ± 2,67 | 8,96 ± 0,12 | 98,35 ± 0,26 | 219,97 ± 1,91 | 4,71 ± 0,01 | 96,74 ± 0,03 | 65,27 ± 0,25 | 4,72 ± 0,02  | 93,27 ± 1,30  | 14,76 ± 1,03 | 9,87 ± 0,63 |
| Secondary forest (SF)           | 26,13 ± 0,83            | 90,24 ± 5,26  | 122,82 ± 99,43  | 150,62 ± 1,09 | 5,62 ± 0,49 | 89,06 ± 0,13 | 190,07 ± 0,72 | 4,10 ± 0,01 | 96,91 ± 0,15 | 58,09 ± 0,12 | 9,07 ± 0,12  | 81,00 ± 0,80  | 16,60 ± 0,50 | 6,76 ± 0,43 |
| Incipient secondary forest (IF) | 26,81 ± 1,37            | 75,88 ± 14,65 | 122,41 ± 100,01 | 13,56 ± 0,50  | 3,60 ± 0,49 | 54,59 ± 0,36 | 41,93 ± 0,80  | 2,19 ± 0,24 | 86,91 ± 0,67 | 18,81 ± 4,38 | 9,79 ± 2,07  | 47,42 ± 01,03 | 34,28 ± 1,20 | 7,51 ± 0,88 |
| Agroforestry (AF)               | 27,00 ± 1,44            | 74,82 ± 15,69 | 96,72 ± 94,24   | 44,71 ± 0,46  | 2,71 ± 0,46 | 71,00 ± 1,31 | 22,11 ± 1,81  | 6,00 ± 0,00 | 96,25 ± 0,45 | 20,59 ± 3,97 | 6,30 ± 0,47  | 9,60 ± 0,65   | 7,80 ± 0,59  | 3,73 ± 0,45 |
| Pasture (PA)                    | 29,34 ± 3,27            | 71,34 ± 17,03 | 126,62 ± 100,91 | 0,00 ± 0,00   | 2,16 ± 0,40 | 0,00 ± 0,00  | 4,64 ± 0,48   | 0,20 ± 0,10 | 9,96 ± 0,54  | 16,52 ± 3,58 | 16,10 ± 0,71 | 1,09 ± 0,29   | 5,20 ± 0,51  | 2,00 ± 0,00 |

Legend: Means and associated standard deviation for the environmental variables monitored. Ecosystems: Primary forest (PF), Secondary forest (SF), Incipient Secondary Forest (IF), Agroforestry (AF) and Pasture (PA).

**Table S3.** Abundance (N) and Richness (S) associated with the Recognizable Functional Units (RFU) and Recognizable Taxonomic Units (RTU) (Cardoso *et. al.* 2011), in the ecosystems monitored in the Brazilian Amazon. Ecosystems: PF = Primary forest; SF = Secondary forest (15 years of regeneration); IF = Incipient secondary forest (5 years of regeneration); AF = Agroforestry (Cocoa); PA = Pasture.

| Spider                 |                                               | ecosystems |           |           |           |           |            |
|------------------------|-----------------------------------------------|------------|-----------|-----------|-----------|-----------|------------|
| RFU                    | RTU                                           | PF         | SF        | IF        | AF        | PA        | Total      |
| GH<br>(Ground hunters) | <i>Lycosidae</i>                              | 6          | 11        | 4         | 0         | 10        | 31         |
|                        | <i>Corinnidae</i>                             | 16         | 7         | 18        | 15        | 3         | 59         |
|                        | <i>Oonopidae</i>                              | 25         | 6         | 7         | 41        | 5         | 84         |
|                        | <i>Gnaphosidae</i><br>( <i>Prodidominae</i> ) | 1          | 1         | 0         | 0         | 0         | 2          |
|                        | <i>Gnaphosidae</i><br>( <i>Gnaphosinae</i> )  | 4          | 0         | 0         | 7         | 0         | 11         |
|                        | <i>Paratropididae</i>                         | 1          | 0         | 0         | 0         | 3         | 4          |
|                        | <b>Sub -Total</b>                             | <b>53</b>  | <b>25</b> | <b>29</b> | <b>63</b> | <b>21</b> | <b>191</b> |
| S                      | <i>Zodariida</i>                              | 0          | 0         | 2         | 0         | 0         | 2          |

|                                               |                          |           |           |           |           |           |            |
|-----------------------------------------------|--------------------------|-----------|-----------|-----------|-----------|-----------|------------|
| (Specialists)                                 | <i>Palpimanidae</i>      | 4         | 2         | 1         | 5         | 0         | 12         |
|                                               | <i>Caponiidae</i>        | 0         | 1         | 0         | 1         | 1         | 3          |
|                                               | <b>Sub -Total</b>        | <b>4</b>  | <b>3</b>  | <b>3</b>  | <b>6</b>  | <b>1</b>  | <b>17</b>  |
| SWW<br>(Sensing web weavers)                  | <i>Theraphosidae</i>     | 2         | 0         | 4         | 1         | 1         | 8          |
|                                               | <i>Segestriidae</i>      | 36        | 37        | 4         | 53        | 0         | 130        |
|                                               | <i>Cyrtacheniidae</i>    | 1         | 1         | 0         | 0         | 0         | 2          |
|                                               | <b>Sub -Total</b>        | <b>39</b> | <b>38</b> | <b>8</b>  | <b>54</b> | <b>1</b>  | <b>140</b> |
| OH<br>(Other hunters)                         | <i>Oxyopidae</i>         | 0         | 1         | 0         | 0         | 1         | 2          |
|                                               | <i>Sparassidae</i>       | 0         | 0         | 0         | 1         | 1         | 2          |
|                                               | <i>Scytodidae</i>        | 0         | 0         | 0         | 3         | 0         | 3          |
|                                               | <i>Liocranidae</i>       | 2         | 0         | 0         | 0         | 0         | 2          |
|                                               | <i>Salticidae</i>        | 9         | 7         | 11        | 15        | 1         | 43         |
|                                               | <i>Ctenidae</i>          | 27        | 15        | 12        | 15        | 10        | 79         |
|                                               | <i>Anyphaenidae</i>      | 0         | 0         | 1         | 0         | 0         | 1          |
|                                               | <b>Sub -Total</b>        | <b>38</b> | <b>23</b> | <b>24</b> | <b>34</b> | <b>13</b> | <b>132</b> |
| OWW<br>(Orb web weavers)                      | <i>Araneidae</i>         | 1         | 28        | 1         | 26        | 0         | 56         |
|                                               | <i>Uloboridae</i>        | 0         | 1         | 0         | 0         | 1         | 2          |
|                                               | <i>Tetragnathidae</i>    | 0         | 1         | 0         | 0         | 0         | 1          |
|                                               | <i>Symphytognathidae</i> | 1         | 0         | 0         | 0         | 0         | 1          |
|                                               | <b>Sub -Total</b>        | <b>2</b>  | <b>30</b> | <b>1</b>  | <b>26</b> | <b>1</b>  | <b>60</b>  |
| ShWWOH<br>(Sheet web weavers/ Others hunters) | <i>Linyphiidae</i>       | 0         | 7         | 2         | 41        | 3         | 53         |
|                                               | <b>Sub -Total</b>        | <b>0</b>  | <b>7</b>  | <b>2</b>  | <b>41</b> | <b>3</b>  | <b>53</b>  |
| ShWW<br>(Sheet web weavers)                   | <i>Dipluridae</i>        | 7         | 1         | 4         | 4         | 0         | 16         |
|                                               | <i>Ochyroceratidae</i>   | 0         | 0         | 7         | 6         | 0         | 13         |
|                                               | <i>Hahniidae</i>         | 0         | 2         | 0         | 0         | 0         | 2          |

|                                               |                    |            |            |           |            |           |            |
|-----------------------------------------------|--------------------|------------|------------|-----------|------------|-----------|------------|
|                                               | <i>Pisauridae</i>  | 1          | 0          | 0         | 0          | 2         | 3          |
|                                               | <b>Sub -Total</b>  | <b>8</b>   | <b>3</b>   | <b>11</b> | <b>10</b>  | <b>2</b>  | <b>34</b>  |
| SWW<br>(Space web weavers)                    | <i>Pholcidae</i>   | 3          | 1          | 3         | 3          | 1         | 11         |
|                                               | <i>Nesticidae</i>  | 0          | 1          | 0         | 1          | 0         | 2          |
|                                               | <i>Theridiidae</i> | 1          | 2          | 1         | 1          | 0         | 5          |
|                                               | <b>Sub -Total</b>  | <b>4</b>   | <b>4</b>   | <b>4</b>  | <b>5</b>   | <b>1</b>  | <b>18</b>  |
| ShWWGH<br>(Space web weavers/ Ground hunters) | <i>Dictynidae</i>  | 0          | 0          | 0         | 0          | 2         | 2          |
|                                               | <b>Sub -Total</b>  | <b>0</b>   | <b>0</b>   | <b>0</b>  | <b>0</b>   | <b>2</b>  | <b>2</b>   |
| <b>Family Abundance (N)</b>                   |                    | <b>148</b> | <b>133</b> | <b>85</b> | <b>239</b> | <b>45</b> | <b>647</b> |
| <b>Family Richness (S)</b>                    |                    | <b>19</b>  | <b>20</b>  | <b>16</b> | <b>18</b>  | <b>15</b> | <b>32</b>  |

**Table S4.** Total number of individuals captured the mean and the standard deviation per ecosystem.

| <b>Ecosystems</b>                    | n.º spiders | n.º spiders/trap   |
|--------------------------------------|-------------|--------------------|
| Primary forest (PF)                  | 187         | 4,16 ± 3,41        |
| Secondary forest (SF)                | 173         | 3,84 ± 2,95        |
| Incipient Secondary Forest (IF),     | 133         | 2,96 ± 3,21        |
| Agroforestry (AF)                    | 270         | 6,00 ± 3,21        |
| Pasture for extensive livestock (PA) | 46          | 1,02 ± 0,99        |
| <b>Total</b>                         | <b>809</b>  | <b>3,59 ± 3,29</b> |

**Legend:** Ecosystems: Primary forest (PF), Secondary forest (SF), Incipient Secondary Forest (IF), Agroforestry (AF) and Pasture (PA).

**Table S5.** Specification of the methodology used for monitoring the environmental variables associate with the ecosystems studied.

| Variables                      |  | Specification                    | Monitoring Methodology                                                                                                                        |
|--------------------------------|--|----------------------------------|-----------------------------------------------------------------------------------------------------------------------------------------------|
| Temperature                    |  | Celsius (°C)                     | Measured during the traps installation and removal with a portable weather station (model Oregon Scientific WMR200A).                         |
| Humidity                       |  | Humidity (%)                     | Measured during the traps installation and removal with a portable weather station (model Oregon Scientific WMR200A).                         |
| Precipitation                  |  | Precipitation (mm)               | Measured during the traps installation and removal with a portable weather station (model Oregon Scientific WMR200A).                         |
| Circumference at Breast Height |  | Centimeters (cm)                 | Trunk diameter was taken at breast height (1.3 m) for the trees.                                                                              |
| Circumference at Ankle Height  |  | Centimeters (cm)                 | The diameter was measured at the ankle height (CAH = 0.1 m) for the shrubs.                                                                   |
| Canopy Cover                   |  | Percentage (%)                   | Calculated with a convex spherical densiometer (D) Lemmon and assigned the following classes: 0–5%, 6–25%, 26–50%, 51–75%, 76–95% and 96–100% |
| Richness of Trees              |  | Tree Species/ m <sup>2</sup>     | The number of tree species was counted in an area of 100 m <sup>2</sup> (10 x 10 m) in the vicinity of each pitfall trap.                     |
| Abundance of Trees             |  | Number of Trees/ m <sup>2</sup>  | The number of tree was counted in an area of 100 m <sup>2</sup> (10 x 10 m) in the vicinity of each pitfall trap.                             |
| Richness of Shrubs             |  | Shrubs Species / m <sup>2</sup>  | The number of shrubs species was counted in an area of 100 m <sup>2</sup> (10 x 10 m) in the vicinity of each pitfall trap.                   |
| Abundance of Shrubs            |  | Number of Shrubs/ m <sup>2</sup> | The number of shrubs was counted in an area of 100 m <sup>2</sup> (10 x 10 m) in the vicinity of each pitfall trap.                           |

|                                     |      |                                 |                                                                                                                                                                   |
|-------------------------------------|------|---------------------------------|-------------------------------------------------------------------------------------------------------------------------------------------------------------------|
| Percentage Exposed Soil             | of   | Percentage (%) / m <sup>2</sup> | The percentage exposed soil in each quadrant was estimated in different percentage classes (0-5, 6-25, 26-50, 51-75, 76-95, 96-100%)                              |
| Percentage Green (vegetation) Cover | of   | Percentage (%) / m <sup>2</sup> | The percentage green cover (vegetation up to 1 m height) in each quadrant was estimated in different percentage classes (0-5, 6-25, 26-50, 51-75, 76-95, 96-100%) |
| Percentages Leaf Litter Cover       | of   | Percentage (%)                  | The percentage of litter in each quadrant was estimated in different percentage classes (0-5, 6-25, 26-50, 51-75, 76-95, 96-100%).                                |
| Height of Litter                    | Leaf | Centimeters (cm)                | Litter height was measured using a ruler at five points inside the square (near each corner and in the center)                                                    |

---

Adapted Da Silva and Hernández (2016)

**Table S6.** Generalized linear models (GLzM) relating High level diversity abundance (HLDa), High-level diversity richness (HLDr) and High-level functionality (HLF) with the different Ecosystems, seasons, and their interactions.

| Factors                           | Estimate Std.<br>Error  | z value       | Pr (> z )                           |
|-----------------------------------|-------------------------|---------------|-------------------------------------|
| <b>HLDa</b>                       |                         |               |                                     |
| <b>(Intercept)</b>                | <b>1,3863 ± 0,1413</b>  | <b>9,809</b>  | <b>&lt; 2x10<sup>-16</sup> ***</b>  |
| <b>Ecosystem [SF]</b>             | <b>-0,9589 ± 0,2685</b> | <b>-3,571</b> | <b>4,4x10<sup>-4</sup> ***</b>      |
| <b>Ecosystem [IF]</b>             | <b>-2,0149 ± 0,4121</b> | <b>-4,890</b> | <b>2,0x10<sup>-6</sup> ***</b>      |
| Ecosystem [PF]                    | -0,1431 ± 0,2074        | -0,690        | 4,9x10 <sup>-1</sup>                |
| <b>Ecosystem [PA]</b>             | <b>-1,7918 ± 0,3739</b> | <b>-4,792</b> | <b>3,1x10<sup>-6</sup> ***</b>      |
| <b>Season [I]</b>                 | <b>0,5404 ± 0,1778</b>  | <b>3,039</b>  | <b>2,67<sup>-3</sup> **</b>         |
| Season [R]                        | 0,2364 ± 0,1891         | 1,250         | 2,1 x10 <sup>-1</sup>               |
| Ecosystem [SF]: Season [I]        | 0,5868 ± 0,3172         | 1,850         | 6,5 x10 <sup>-2</sup>               |
| Ecosystem [IF]: Season [I]        | 0,9065 ± 0,4655         | 1,948         | 5,3 x10 <sup>-2</sup>               |
| Ecosystem [PF]: Season [I]        | -0,1876 ± 0,2662        | -0,705        | 4,8 x10 <sup>-1</sup>               |
| Ecosystem [PA]: Season [I]        | 0,3351 ± 0,4488         | 0,747         | 4,6 x10 <sup>-1</sup>               |
| Ecosystem [SF]: Season [R]        | 0,2917 ± 0,3444         | 0,847         | 4,0 x10 <sup>-1</sup>               |
| <b>Ecosystem [IF]: Season [R]</b> | <b>1,3730 ± 0,4642</b>  | <b>2,958</b>  | <b>3,5 x10<sup>-3</sup> **</b>      |
| <b>Ecosystem [PF]: Season [R]</b> | <b>-1,0966 ± 0,3366</b> | <b>-3,258</b> | <b>1,3 x10<sup>-3</sup> **</b>      |
| Ecosystem [PA]: Season [R]        | -0,1411 ± 0,5143        | -0,274        | 7,8 x10 <sup>-1</sup>               |
| <b>HLDr</b>                       |                         |               |                                     |
| <b>(Intercept)</b>                | <b>1,2809 ± 0,1235</b>  | <b>10,372</b> | <b>&lt; 2 x10<sup>-16</sup> ***</b> |
| <b>Ecosystem [SF]</b>             | <b>-0,8535 ± 0,2260</b> | <b>-3,777</b> | <b>2,1 x10<sup>-4</sup> ***</b>     |
| <b>Ecosystem [IF]</b>             | <b>-1,9095 ± 0,3438</b> | <b>-5,554</b> | <b>8,4 x10<sup>-8</sup> ***</b>     |
| Ecosystem [PF]                    | -0,1823 ± 0,1832        | -0,995        | 3,2 x10 <sup>-1</sup>               |
| <b>Ecosystem [PA]</b>             | <b>-1,6864 ± 0,3124</b> | <b>-5,397</b> | <b>1,9 x10<sup>-7</sup> ***</b>     |
| Season [I]                        | 0,2157 ± 0,1660         | 1,3           | 2,0 x10 <sup>-1</sup>               |
| Season [R]                        | -0,0377 ± 0,1763        | -0,214        | 8,3 x10 <sup>-1</sup>               |
| <b>Ecosystem [SF]: Season [I]</b> | <b>0,6000 ± 0,2814</b>  | <b>2,132</b>  | <b>3,4 x10<sup>-2</sup> *</b>       |
| <b>Ecosystem [IF]: Season [I]</b> | <b>1,2014 ± 0,3943</b>  | <b>3,047</b>  | <b>2,6 x10<sup>-3</sup> **</b>      |

|                                    |                           |               |                                 |
|------------------------------------|---------------------------|---------------|---------------------------------|
| Ecosystem [PF]: Season [I]         | 0,0552 ± 0,2446           | 0,226         | 8,2 x10 <sup>-1</sup>           |
| Ecosystem [PA]: Season [I]         | 0,6172 ± 0,3817           | 1,617         | 0,1074                          |
| Ecosystem [SF]: Season [R]         | 0,2345 ± 0,3104           | 0,755         | 0,4508                          |
| <b>Ecosystem [IF]: Season [R]</b>  | <b>1,5959 ± 0,3946</b>    | <b>4,044</b>  | <b>7,5 x10<sup>-5</sup> ***</b> |
| <b>Ecosystem [PF]: Season [R]</b>  | <b>-0,8244 ± 0,3046</b>   | <b>-2,707</b> | <b>7,3 x10<sup>-3</sup> **</b>  |
| Ecosystem [PA]: Season [R]         | 0,1331 ± 0,4340           | 0,307         | 7,6 x10 <sup>-1</sup>           |
| <b>HLF</b>                         |                           |               |                                 |
| <b>(Intercept)</b>                 | <b>1,1600 ± 0,1443</b>    | <b>8,059</b>  | <b>7.72e-16 ***</b>             |
| <b>Ecosystem [SF]</b>              | <b>-0,8270 ± 0,2616</b>   | <b>-3,16</b>  | <b>0.00158 **</b>               |
| <b>Ecosystem [IF]</b>              | <b>-1,7900 ± 0,3819</b>   | <b>-4,692</b> | <b>2.71e-06 ***</b>             |
| Ecosystem [PF]                     | -0,3160 ± 0,2223          | -1,421        | 0,15531                         |
| <b>Ecosystem [PA]</b>              | <b>-1,5700 ± 0,3476</b>   | <b>-4,513</b> | <b>6.40e-06 ***</b>             |
| Season [I]                         | 0,2230 ± 0,1936           | 1,152         | 0,24919                         |
|                                    | -6,7 x10 <sup>-17</sup> ± |               |                                 |
| Season [R]                         | 0,2041                    | 0,000         | 1                               |
| Ecosystem [SF]: Season [I]         | 0,5390 ± 0,3276           | 1,645         | 0.09994                         |
| <b>Ecosystem [IF]: Season [I]</b>  | <b>1,0700 ± 0,4438</b>    | <b>2,399</b>  | <b>0.01644 *</b>                |
| Ecosystem [PF]: Season [I]         | 0,1130 ± 0,2941           | 0,385         | 0,69996                         |
| Ecosystem [PA]: Season [I]         | 0,4700 ± 0,4330           | 1,085         | 0,27773                         |
| Ecosystem [SF]: Season [R]         | 0,1340 ± 0,3619           | 0,369         | 0,71213                         |
| <b>Ecosystem [IF]: Season [ R]</b> | <b>1,4200 ± 0,4438</b>    | <b>3,193</b>  | <b>0.00141 **</b>               |
| <b>Ecosystem [PF]: Season [R]</b>  | <b>-0,9160 ± 0,3764</b>   | <b>-2,434</b> | <b>0.01491 *</b>                |
| Ecosystem [PA]: Season [R]         | -0,3290 ± 0,4916          | 0,000         | 1                               |

Legend: Signif. codes: \* P < 0.05; \*\* P < 0.01; \*\*\* P < 0.001; Ecosystems: Primary forest (PF), Secondary forest (SF), Incipient Forest (IF), Agroforestry (AF) and Pasture (PA); Seasons: Dry (D), Intermediate (I), Rainy (R)). Quasi-Poisson GLzM values: HLDa (Null deviance: 508.36 on 224 degrees of freedom, Residual deviance: 236.26 on 210 degrees of freedom, AIC: NA); HLDr (Null deviance: 341.95 on 224 degrees of freedom, Residual deviance: 181.64 on 210 degrees of freedom, AIC: NA); HLF (Null deviance: 269.18 on 224 degrees of freedom, Residual deviance: 132.45 on 210 degrees of freedom; AIC: NA)

**Table S7.** Non-metric Multidimensional Scaling (NMDS) results for High-level Diversity (HLD): environmental variables and ecosystems association with the principal axis (axis 1 and axis 2). Ecosystems: PF = Primary forest; SF = Secondary forest (15 years of regeneration); IF = Incipient secondary forest (5 years of regeneration); AF = Agroforestry (Cocoa); PA = Pasture. Environmental variables: T = Temperature; H = Humidity; PES = Percentage of exposed soil; LLC = Percentage of leaf litter cover; HLL = Height of leaf litter (cm).

| Environmental Variables | Axis 1   | Axis 2   |
|-------------------------|----------|----------|
| T                       | 0,25227  | -0,21156 |
| H                       | -0,261   | 0,2887   |
| PES                     | 0,34315  | -0,05306 |
| HLL                     | -0,43501 | 0,11628  |
| LLC                     | -0,31167 | 0,18485  |

  

| Ecosystems | Axis 1   | Axis 2   |
|------------|----------|----------|
| PF         | 0,323893 | -0,31825 |
| SF         | 0,76704  | 0,264538 |
| IF         | -1,13769 | -1,17096 |
| AF         | 0,19995  | 0,465317 |
| PA         | -0,15318 | 0,759351 |

**Table S8.** Non-metric Multidimensional Scaling (NMDS) results for High-level Functionality (HLF) environmental variables and ecosystems association with the principal axis (axis 1 and axis 2). Ecosystems: PF = Primary forest; SF = Secondary forest (15 years of regeneration); IF = Insipient secondary forest (5 years of regeneration); AF = Agroforestry (Cocoa); PA = Pasture. Environmental variables: T = Temperature; H = Humidity; PES = Percentage of exposed soil; LLC = Percentage of leaf litter cover; HLL = Height of leaf litter (cm).

| Environmental Variables | Axis 1   | Axis 2   |
|-------------------------|----------|----------|
| T                       | -0,2509  | 0,20969  |
| H                       | 0,1739   | 0,052127 |
| PES                     | -0,09697 | 0,12923  |
| HLL                     | 0,032005 | 0,1547   |
| LLC                     | 0,21227  | -0,15275 |

  

| Ecosystems | Axis 1   | Axis 2   |
|------------|----------|----------|
| PF         | -1,04853 | -1,05944 |
| SF         | -0,47194 | 1,029478 |
| IF         | 0,719777 | -0,8759  |
| AF         | -1,0735  | 0,497016 |
| PA         | 1,874185 | 0,408857 |

**Table S9.** Depicting High-level diversity (HLD) dissimilarities

| High-level diversity (HLD) dissimilarities | PF-SF | PF-IF | PF-AF | PF-PA | SF-IF | SF-AF | SF-PA | IF-PA | IF-AF |
|--------------------------------------------|-------|-------|-------|-------|-------|-------|-------|-------|-------|
| Turnover ( $\beta_{sim}$ )                 | 0,286 | 0,222 | 0,300 | 0,353 | 0,222 | 0,250 | 0,294 | 0,412 | 0,167 |
| Nestedness ( $\beta_{nes}$ )               | 0,017 | 0,060 | 0,017 | 0,068 | 0,078 | 0,036 | 0,090 | 0,017 | 0,044 |
| Bsor ( $\beta_{sor}$ )                     | 0,302 | 0,282 | 0,317 | 0,421 | 0,300 | 0,286 | 0,385 | 0,429 | 0,211 |

Legend: PF = Primary forest; SF = Secondary forest (15 years of regeneration); IF = Incipient secondary forest (5 years of regeneration); AF = Agroforestry (Cocoa); PA = Pasture. Beta diversity partition analysis was applied to verify the dissimilarity between ecosystems. Using the partitioning framework proposed by Baselga (2010), the pairwise dissimilarity index ( $\beta_{sor}$ ) was partitioned into two components: turnover ( $\beta_{sim}$ ) and nestedness ( $\beta_{nes}$ ):  $\beta_{sor} = \beta_{sim} + \beta_{nes}$

**Table S10.** Depicting High-level diversity (HLD) dissimilarities

| High-level diversity (HLD) dissimilarity | PF-SF | PF-IF | PF-AF | PF-PA | SF-IF | SF-AF | SF-PA | IF-PA | IF-AF |
|------------------------------------------|-------|-------|-------|-------|-------|-------|-------|-------|-------|
| Turnover ( $\beta_{sim}$ )               | 0,000 | 0,000 | 0,000 | 0,000 | 0,000 | 0,000 | 0,000 | 0,000 | 0,000 |
| Nestedness ( $\beta_{nes}$ )             | 0,059 | 0,059 | 0,059 | 0,111 | 0,000 | 0,000 | 0,053 | 0,053 | 0,000 |
| Bsor ( $\beta_{sor}$ )                   | 0,059 | 0,059 | 0,059 | 0,111 | 0,000 | 0,000 | 0,053 | 0,053 | 0,000 |

Legend: PF = Primary forest; SF = Secondary forest (15 years of regeneration); IF = Incipient secondary forest (5 years of regeneration); AF = Agroforestry (Cocoa); PA = Pasture. Beta diversity partition analysis was applied to verify the dissimilarity between ecosystems. Using the partitioning framework proposed by Baselga (2010), the pairwise dissimilarity index ( $\beta_{sor}$ ) was partitioned into two components: turnover ( $\beta_{sim}$ ) and nestedness ( $\beta_{nes}$ ):  $\beta_{sor} = \beta_{sim} + \beta_{nes}$

**Table S11.** SIMPER results comparing the composition of High-level Diversity (Recognizable Taxonomy Units (RTU)) and High-level Functionality (Recognizable Functional Units (RFU)) between ecosystems. Ecosystems: PF = Primary forest; SF = Secondary forest (15 years of regeneration); IF = Insipient secondary forest (5 years of regeneration); AF = Agroforestry (Cocoa); Guilds explanation: TA.GH (Ground hunters); TA.SWW (Space web weavers); TA.OH (Other Hunters); TA.OWW (Orb web weavers); TA.ShWWOT (Sheet web weavers/ Others hunters).

| RTU          | PF vs SF | PF vs IF | PF vs AF | PF vs PA | SF vs IF | SF vs AF | SF vs PA | IF vs AF | IF vs PA | AF vs PA |
|--------------|----------|----------|----------|----------|----------|----------|----------|----------|----------|----------|
| Araneidae    | 59%      |          | 29%      |          | 38%      | 35%      | 60%      | 31%      |          | 36%      |
| Corinnidae   | 76%      | 56%      | 62%      | 72%      | 68%      | 64%      |          | 62%      | 49%      | 62%      |
| Ctenidae     | 33%      | 45%      | 52%      | 53%      | 58%      | 46%      | 34%      | 71%      | 27%      | 45%      |
| Linyphiidae  |          | 64%      | 70%      |          | 48%      | 55%      | 73%      | 53%      | 39%      | 54%      |
| Lycosidae    | 67%      |          |          | 64%      |          |          | 48%      |          | 60%      |          |
| Oonopidae    | 47%      | 17%      | 41%      | 38%      | 27%      |          | 67%      | 43%      | 16%      | 75%      |
| Salticidae   |          | 72%      |          |          | 75%      | 72%      |          |          | 68%      | 69%      |
| Segestriidae | 19%      | 33%      | 17%      | 22%      | 15%      | 20%      | 20%      | 20%      | 73%      | 24%      |
| Median       | 50%      | 48%      | 45%      | 50%      | 47%      | 49%      | 50%      | 47%      | 47%      | 52%      |

| RFU       | PF vs SF | PF vs IF | PF vs AF | PF vs PA | SF vs IF | SF vs AF | SF vs PA | IF vs AF | IF vs PA | AF vs PA |
|-----------|----------|----------|----------|----------|----------|----------|----------|----------|----------|----------|
| TA.GH     | 28%      | 28%      | 22%      | 31%      | 26%      | 42%      | 25%      | 44%      | 32%      | 47%      |
| TA.SWW    | 51%      | 49%      | 43%      | 59%      | 44%      | 23%      | 47%      | 23%      | 78%      | 29%      |
| TA.OH     | 72%      | 71%      | 63%      | 82%      | 60%      | 78%      | 66%      | 60%      | 53%      | 64%      |
| TA.OWW    |          |          | 77%      |          | 73%      | 60%      | 82%      | 73%      |          | 79%      |
| TA.ShWWOT |          |          |          |          |          |          |          |          | 67%      |          |
| Median    | 50%      | 49%      | 51%      | 57%      | 51%      | 51%      | 55%      | 50%      | 58%      | 55%      |

**Table S12.** Indicator Recognizable Taxonomic Units (RTU) and indicator Recognizable Functional Units (RFU), derived from the Indicator value analysis (Indval), associated with the Spiders of the ecosystems studied. Ecosystems: PF = Primary forest; SF = Secondary forest (15 years of regeneration); IF = Incipient secondary forest (5 years of regeneration); AF = Agroforestry (Cocoa); RFU explanation: TA.GH (Ground hunters); TA.SWW (Space web weavers); TA.OH (Other Hunters); TA.OWW (Orb web weavers); TA.ShWWOT (Sheet web weavers/ Others hunters).

| RTU             | Ecosystem | Indval     | p-value | Freq |
|-----------------|-----------|------------|---------|------|
| Ctenidae        | PF        | 0,16152166 | 0,045   | 68   |
| Oonopidae       | IF        | 0,15898272 | 0,025   | 60   |
| Ochyroceratidae | IF        | 0,0974026  | 0,016   | 12   |
| Segestriidae    | AF        | 0,35622673 | 0,001   | 88   |
| Araneidae       | AF        | 0,2483236  | 0,001   | 34   |
| Linyphiidae     | AF        | 0,19618313 | 0,001   | 41   |
| Salticidae      | AF        | 0,1781531  | 0,003   | 41   |
| Scytodidae      | AF        | 0,1        | 0,003   | 3    |
| Palpimanidae    | AF        | 0,08349698 | 0,033   | 11   |
| Lycosidae       | PA        | 0,11502951 | 0,027   | 29   |
| Paratropididae  | PA        | 0,07729367 | 0,042   | 4    |
| Dictynidae      | PA        | 0,06451613 | 0,05    | 2    |

  

| RFU       | Ecosystem | Indval     | p-value | Freq |
|-----------|-----------|------------|---------|------|
| TA.OWW    | SF        | 0,20601012 | 0,001   | 35   |
| TA.ShWW   | IF        | 0,11392688 | 0,03    | 32   |
| TA.ShWWOT | AF        | 0,49176493 | 0,001   | 41   |
| TA.SWW    | AF        | 0,27221801 | 0,002   | 95   |
| TA.GH     | AF        | 0,21194044 | 0,038   | 119  |
| TA.SWWGH  | PA        | 0,06451613 | 0,035   | 2    |
